# Supplementary material
Source: MDPI journal article supplement (https://www.mdpi.com/2079-6412/13/3/490)
Supplement: s1 [file s1 › coatings-2193026-supplementary.pdf]

Supplementary Materials

# A Ru-Doped $\text{VTi}_{2.6}\text{O}_{7.2}$ Anode with High Conductivity for Enhanced Sodium Storage

Guangwan Zhang <sup>1,2</sup>, Chunhua Han <sup>1,2,\*</sup>, Kang Han <sup>1</sup>, Jinshuai Liu <sup>1,2</sup>, Jinghui Chen <sup>1,2</sup>, Haokai Wang <sup>1,2</sup>, Lei Zhang <sup>2,3,\*</sup> and Xuanpeng Wang <sup>2,3,\*</sup>

<sup>1</sup> School of Materials Science and Engineering, Hainan Institute, Wuhan University of Technology, Wuhan 430070, China

<sup>2</sup> Hainan Institute, Wuhan University of Technology, Sanya 572000, China

<sup>3</sup> Department of Physical Science & Technology, School of Science, Wuhan University of Technology, Wuhan 430070, China

\* Correspondence: hch5927@whut.edu.cn (C.H.); zhanglei1990@whut.edu.cn (L.Z.); wxp122525691@whut.edu.cn (X.W.)

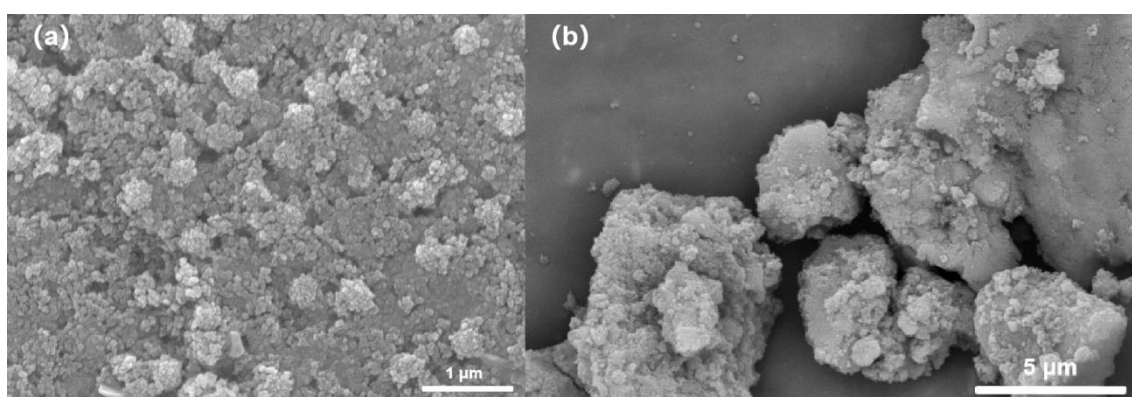

Figure S1. SEM images of (a) Ru-VTO and (b) VTO.

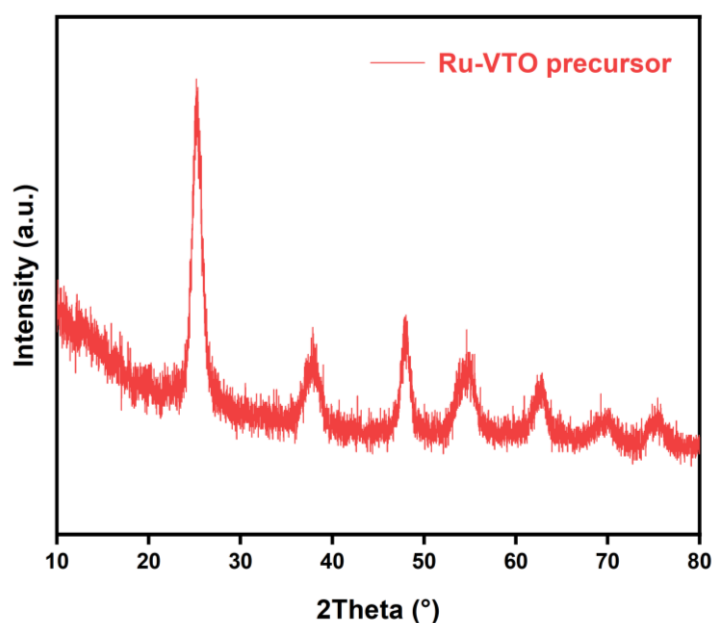

Figure S2. XRD pattern of Ru-VTO precursor.

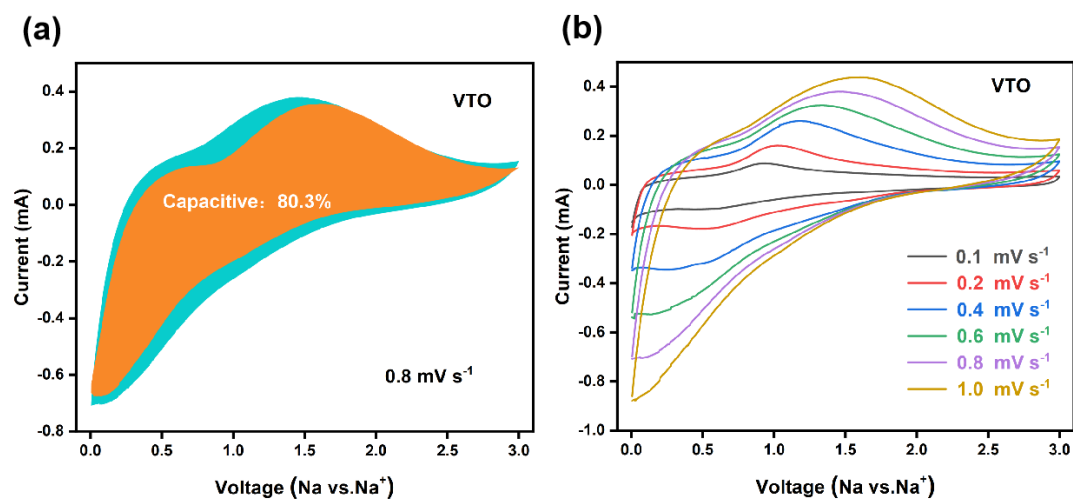

**Figure S3.** (a) The contribution ratio of the capacitive capacities at  $0.8 \text{ mV s}^{-1}$  for VTO. (b) CV curves of VTO at scan rates range from  $0.1$  to  $1.0 \text{ mV s}^{-1}$ .

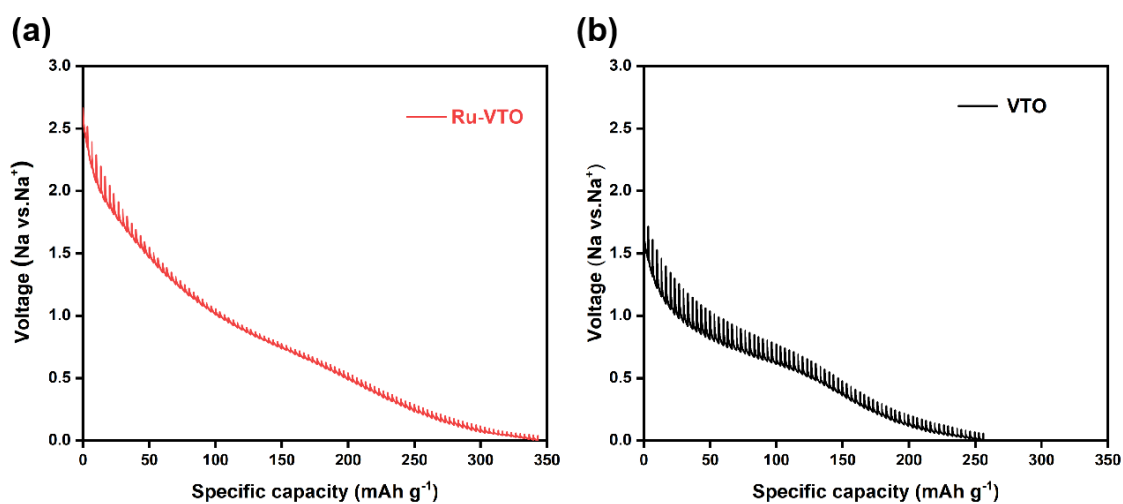

**Figure S4.** Potential response during GITT measurements at  $20 \text{ mA g}^{-1}$  for (a) Ru-VTO and (b) VTO.

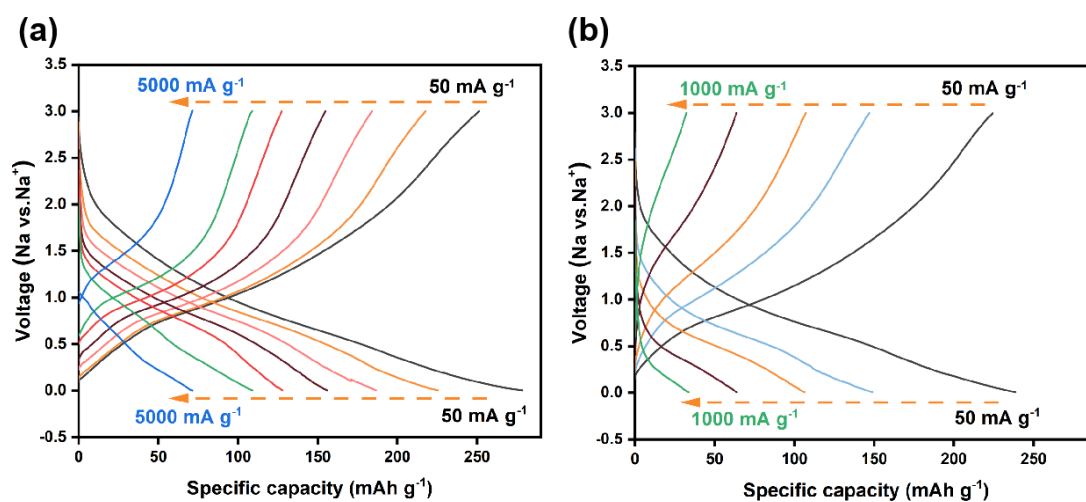

**Figure S5.** Galvanostatic charge and discharge voltage profiles of (a) Ru-VTO and (b) VTO under different current densities.

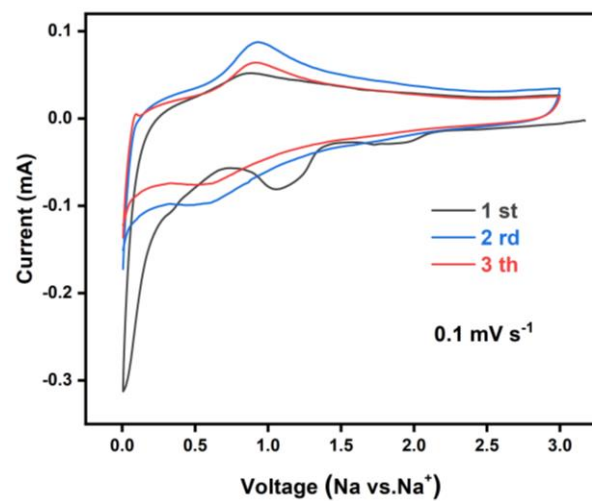

Figure S6. CV test result for the initial three cycles of Ru-VTO at  $0.1 \text{ mV s}^{-1}$ .

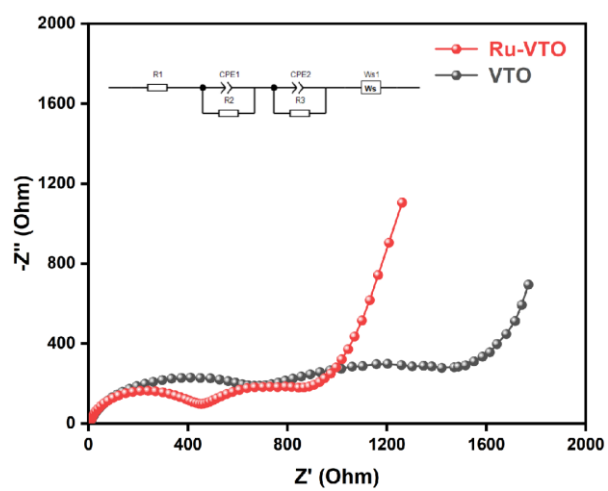

Figure S7. EIS curves of Ru-VTO and VTO.

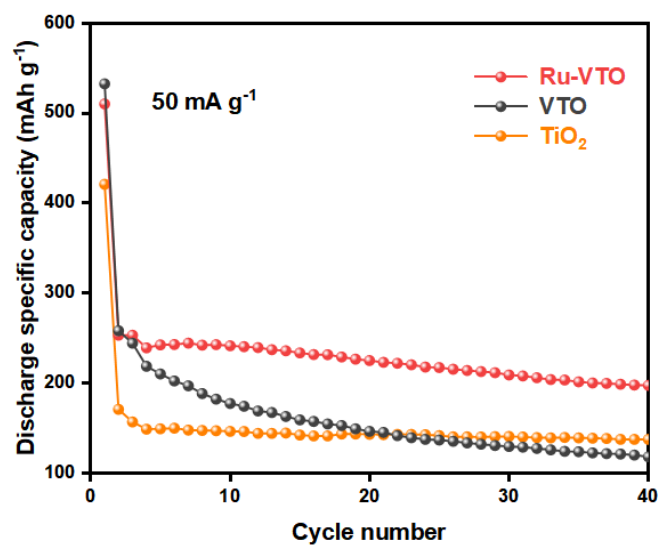

Figure S8. Cycling performance at  $50 \text{ mA g}^{-1}$  for  $\text{TiO}_2$ , VTO and Ru-VTO.

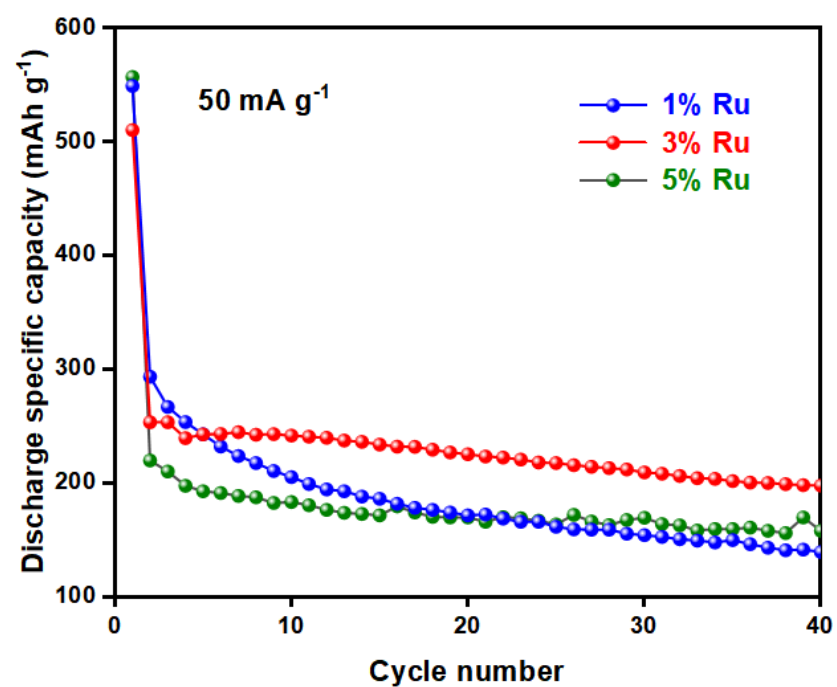

Figure S9. Cycling performance of Ru-doped samples with different concentrations at  $50 \text{ mA g}^{-1}$ .

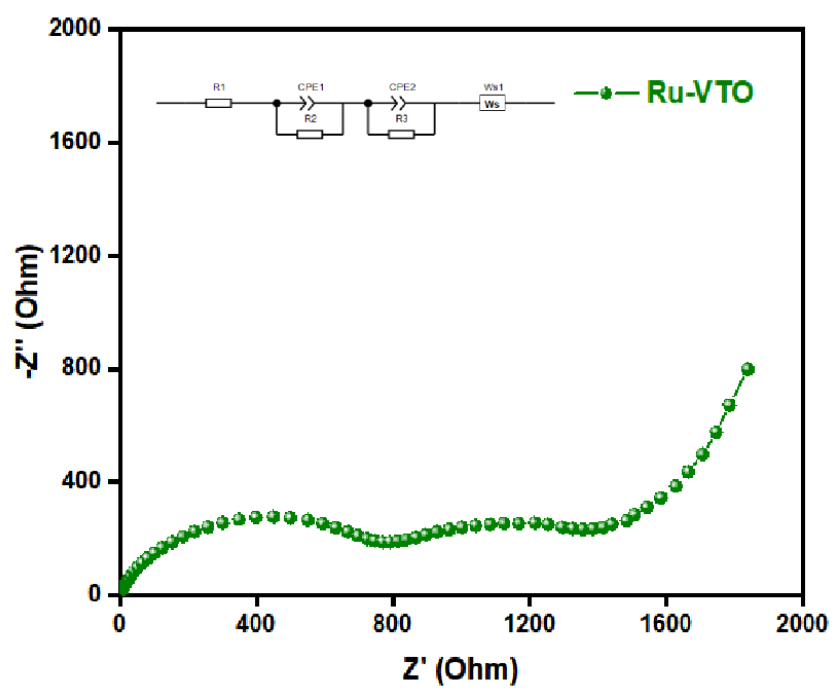

Figure S10. EIS of Ru-VTO after the galvanostatic tests.

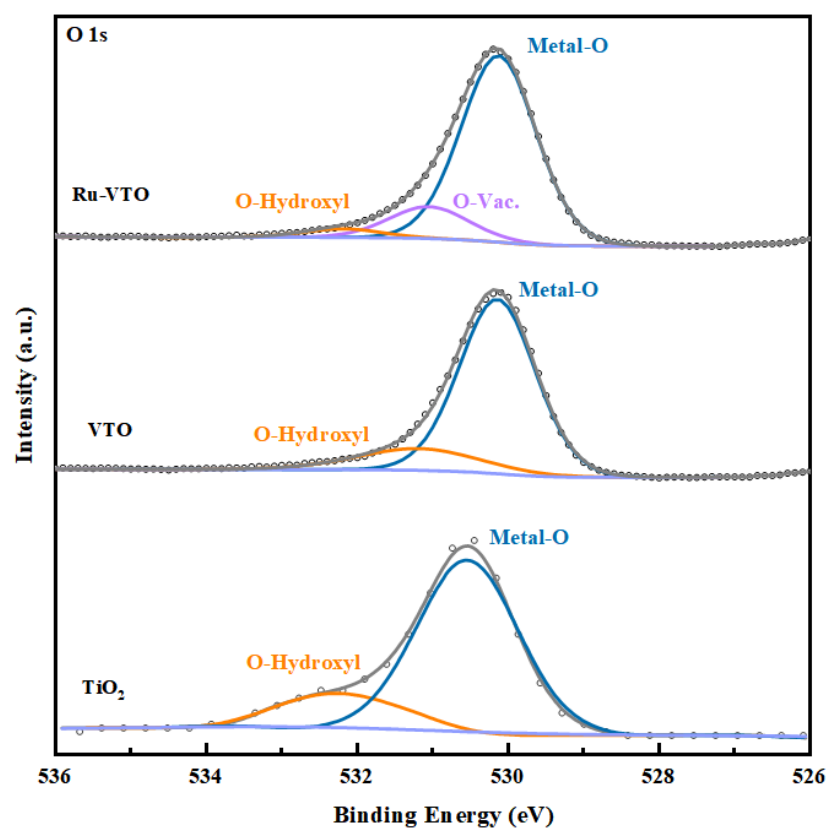

Figure S11. XPS spectra of O 1s for TiO<sub>2</sub>, VTO and Ru-VTO.

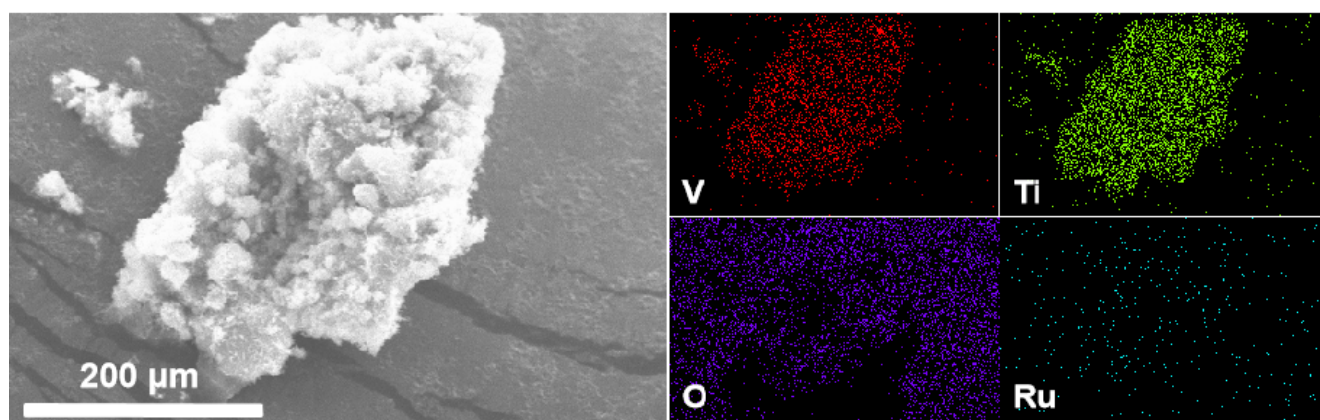

Figure S12. Element mapping of Ru-VTO.

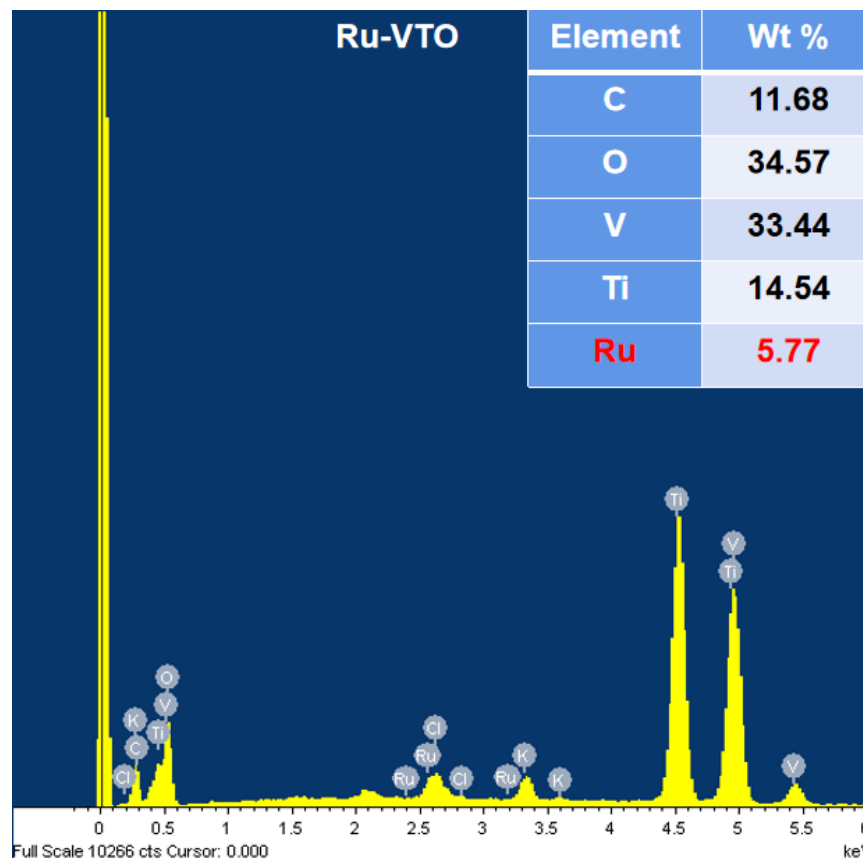

**Figure S13.** The quantitative EDS analysis for Ru-VTO.

The crystallite size of Ru-VTO sample can be calculated according to the following equation:

$$D = \frac{k\lambda}{\beta \cos \theta} \quad (\text{S1})$$

$D$  is the grain size,  $k$ ,  $\lambda$ ,  $\beta$ , and  $\theta$  are Scherrer constant, X-ray wavelength, Diffraction peak half-height width, and Cape Prague respectively. The value of  $k$  is 0.89, and  $\lambda$  is 0.154056, while  $\beta$  and  $\theta$  need to be obtained by XRD profile.

**Table S1.** Elemental content analysis of XPS for Ru-VTO.

| Name  | Pos. | Area     | At. % |
|-------|------|----------|-------|
| V 2p  | 517  | 8276.17  | 8.77  |
| Ti 2p | 468  | 19371.82 | 21.70 |
| O 1s  | 531  | 23666.72 | 68.00 |
| Ru 3d | 281  | 2930.60  | 1.54  |
